# Supplementary material
Source: Royal Society of Chemistry journal article supplement (doi:10.1039/d6cc01734g)
Supplement: d6cc01734g1.pdf [file d6cc01734g1.pdf]

## Supplementary Information

### **Confining Acetonitrile-I<sub>2</sub> Complexes via Fe Single-Atom Sites for Rapid and Reversible Iodine Redox Kinetics at -40°C**

Chuanyang Li,<sup>†,a</sup> Chengxu Niu,<sup>†,a</sup> Ruoyang Xu,<sup>b</sup> Jikun Li,<sup>a</sup> Yanchen Liu,<sup>a</sup> Hengjian Pu,<sup>a</sup> Jin Li,<sup>a</sup> Teng Zhai,<sup>\*a</sup> and Hui Xia<sup>a</sup>

<sup>a</sup>School of Materials Science and Engineering, Nanjing University of Science and Technology, Nanjing 210094, China

<sup>b</sup>College of Science, Mathematics and Technology, Wenzhou-Kean University, Wenzhou 325060, China

E-mail: tengzhai@njust.edu.cn

## **Experimental section**

### **Synthesis of Fe-PC/I<sub>2</sub> and PC/I<sub>2</sub>**

Porous carbon (0.15 g) was dispersed in 30 mL of 0.05 M Fe(NO<sub>3</sub>)<sub>3</sub> solution and incubated at 40 °C for 12 h. The resulting mixture was centrifuged at 9000 rpm for 5 min per cycle, and the process was repeated three times. The collected precipitate was dried at 80 °C for 24 h, followed by annealing at 800 °C for 2 h under an Ar/H<sub>2</sub> atmosphere with a heating rate of 5 °C min<sup>-1</sup>. The resulting powder was then immersed in concentrated hydrochloric acid (HCl) at 60 °C for 8 h, washed thoroughly with deionized water, and dried to obtain Fe-PC. Fe-PC/I<sub>2</sub> and PC/I<sub>2</sub> cathodes were prepared by mixing iodine with the respective carbon hosts at a mass ratio of 1:1, followed by thermal treatment at 120 °C for 24 h. For electrode fabrication, the Fe-PC/I<sub>2</sub> or PC/I<sub>2</sub> composite was combined with Ketjen black and PTFE in isopropanol at a weight ratio of 8:1:1 to obtain a homogeneous slurry. This slurry was spread onto a glass plate and dried at 70 °C for 8 h. The iodine loading of the resulting electrode was controlled between 1 and 1.5 mg cm<sup>-2</sup>.

### **Electrochemical measurements**

To evaluate the electrochemical performance of the Fe-PC/I<sub>2</sub> and PC/I<sub>2</sub> electrodes, CR2025-type coin cells were assembled. The Fe-PC/I<sub>2</sub> or PC/I<sub>2</sub> composite was used as the cathode, while metallic zinc foil served as the anode. Whatman GF/D membrane was employed as the separator. The electrolyte consisted of 1 M Zn(ClO<sub>4</sub>)<sub>2</sub> in acetonitrile (ACN). Galvanostatic charge-discharge (GCD) tests were conducted on Neware BTS-610 battery testing system within a voltage window of 0.6~1.6 V versus Zn<sup>2+</sup>/Zn at various current densities. Cyclic voltammetry (CV) and electrochemical impedance spectroscopy (EIS) measurements were carried out on a Corrtest CS2350H electrochemical workstation.

## Material characterization

X-ray diffraction (XRD) patterns were collected on a Bruker D2 Advance diffractometer using Cu K $\alpha$  radiation ( $\lambda = 1.5418 \text{ \AA}$ ) with a scanning speed of  $2^\circ \text{ min}^{-1}$  over a  $2\theta$  range of  $10^\circ$ – $80^\circ$ . Scanning electron microscopy (SEM) images were obtained using a JEOL JSM-7500F field-emission scanning electron microscope. UV-vis absorption spectra were collected using a Shimadzu UV-3600i Plus UV-Vis-NIR spectrophotometer. Raman spectroscopies were collected using a portable Raman spectrometer (i-Raman Prime 532H, Metrohm) over the range of  $100$ – $500 \text{ cm}^{-1}$ . For in situ Raman spectroscopies at  $25^\circ \text{C}$ , spectra were directly acquired from the electrode in an operating coin cell equipped with a quartz optical window, without disassembling the cell. For ex situ Raman measurements at  $-40^\circ \text{C}$ , the electrodes were extracted from disassembled cells, rinsed with anhydrous acetonitrile to remove residual electrolyte, and dried under vacuum prior to analysis. Differential scanning calorimetry (DSC) was performed on a TGA/DSC3+ system (METTLER Toledo). Approximately 5-10 mg of electrolyte was sealed in an aluminum crucible. The measurement was conducted under nitrogen atmosphere from  $25^\circ \text{C}$  to  $-80^\circ \text{C}$  at a rate of  $5^\circ \text{C min}^{-1}$ .

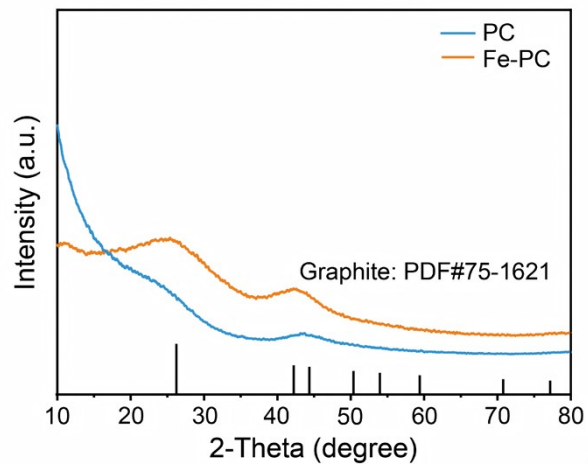

**Figure S1.** XRD patterns of PC and Fe-PC samples.

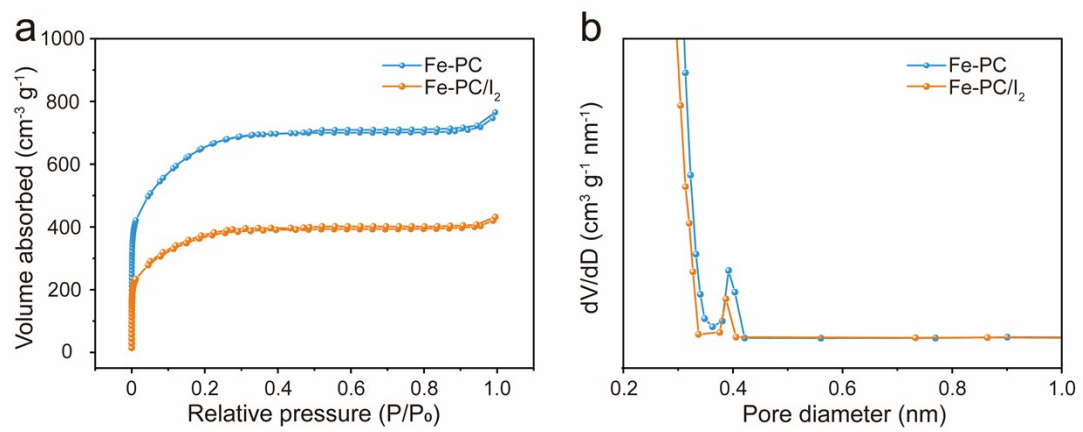

**Figure S2.** (a) Nitrogen adsorption and desorption isotherm of Fe-PC and Fe-PC/I<sub>2</sub>. (b) Pore size distribution curves of Fe-PC and Fe-PC/I<sub>2</sub>.

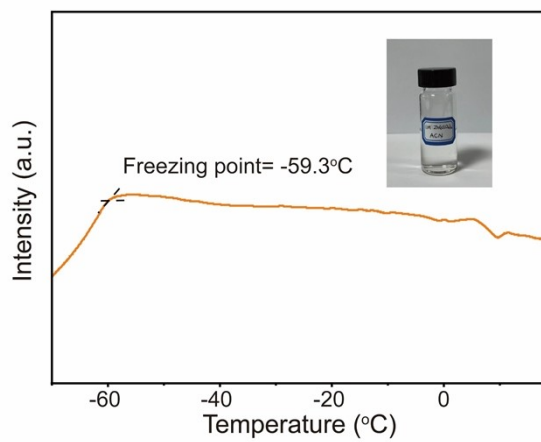

**Figure S3.** DSC curve of 1 M  $\text{Zn}(\text{ClO}_4)_2$  in ACN.

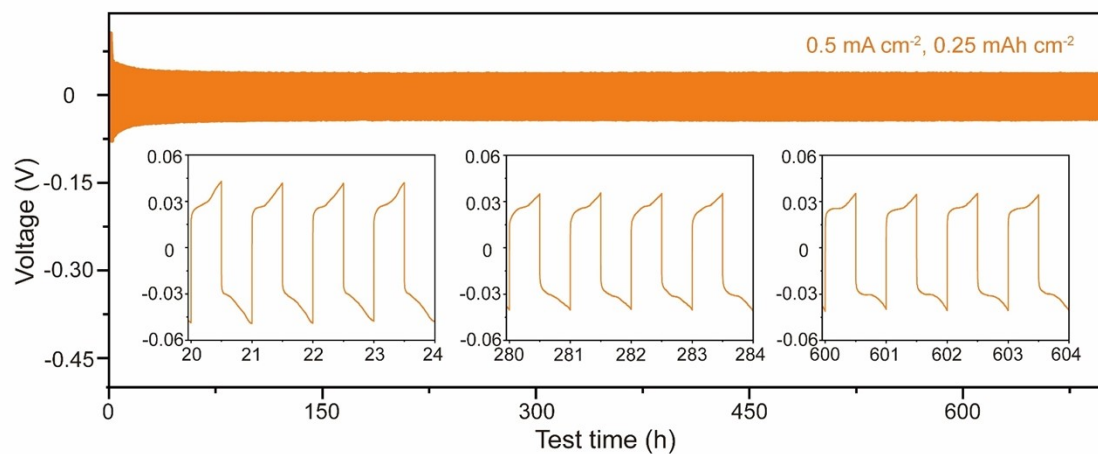

**Figure S4.** Cycling stability of Zn||Zn symmetrical cells in ACN-based electrolyte at 25 °C.

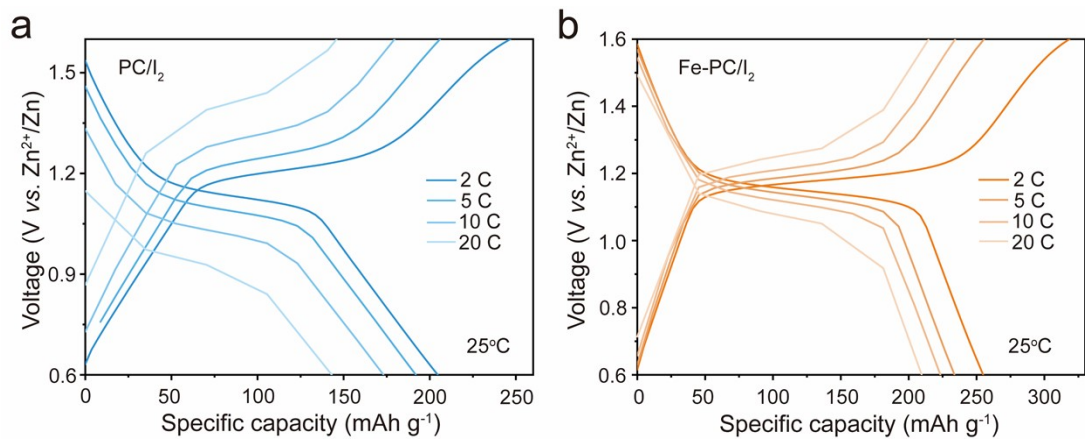

**Figure S5.** GCD curves of of PC/I<sub>2</sub> and Fe-PC/I<sub>2</sub> electrodes collected at different current densities at 25 °C.

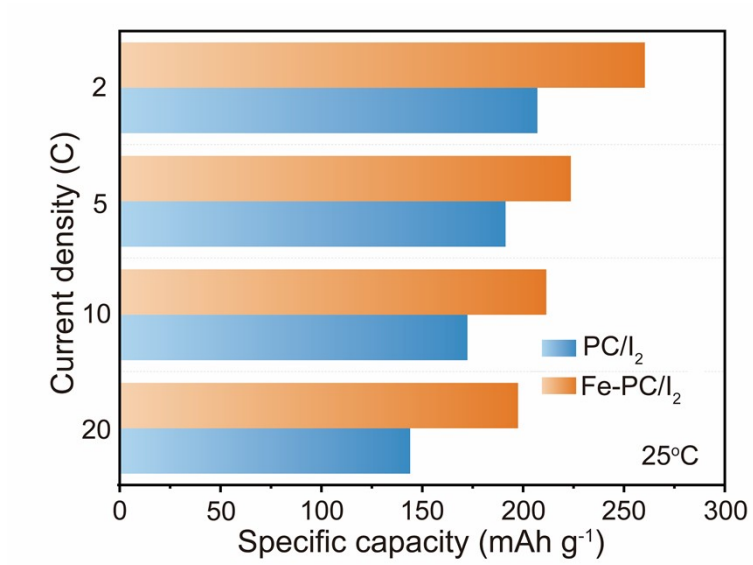

**Figure S6.** Rate performance of PC/I<sub>2</sub> and Fe-PC/I<sub>2</sub> electrodes at varying current densities and 25 °C.

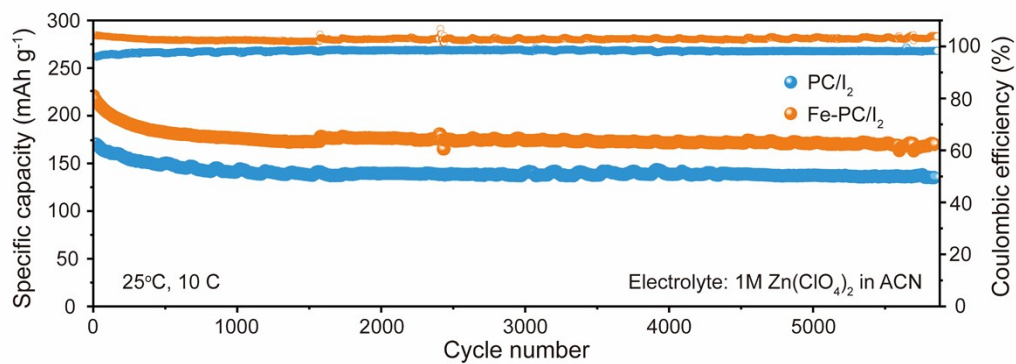

**Figure S7.** The cycling performance of PC/I<sub>2</sub> and Fe-PC/I<sub>2</sub> electrodes at 25°C and 10 C.

The higher diffusivity of the ACN-I<sub>2</sub> charge-transfer complexes at 25 °C partially compromises the immobilization effect of Fe single atoms, leading to a moderate capacity decay of approximately 40 mAh g<sup>-1</sup> after 500 cycles while still sustaining stable cycling over 5800 cycles (Fig. S7).

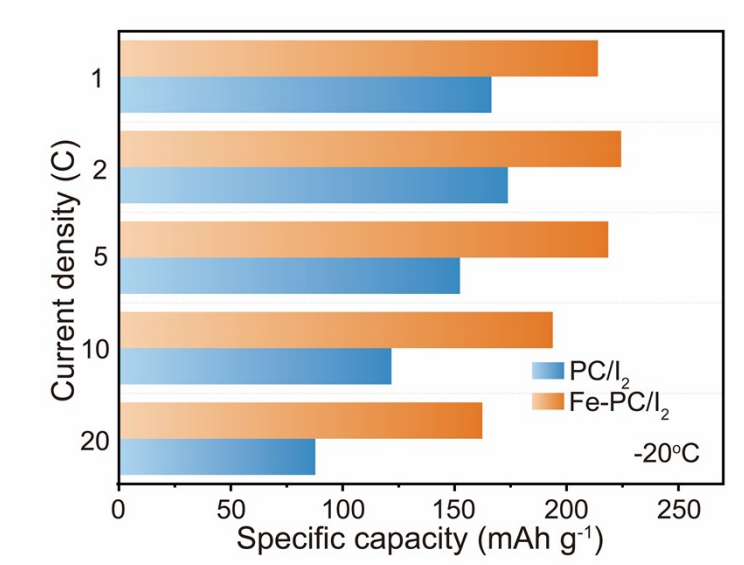

**Figure S8.** Rate performance of PC/I<sub>2</sub> and Fe-PC/I<sub>2</sub> electrodes at varying current densities and -20°C.

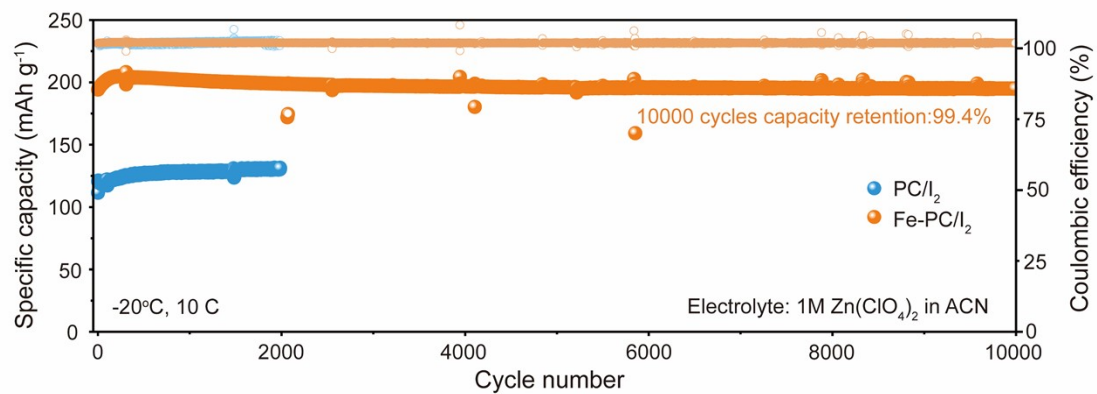

**Figure S9.** The cycling performance of PC/I<sub>2</sub> and Fe-PC/I<sub>2</sub> electrodes at -20°C and 10 C.

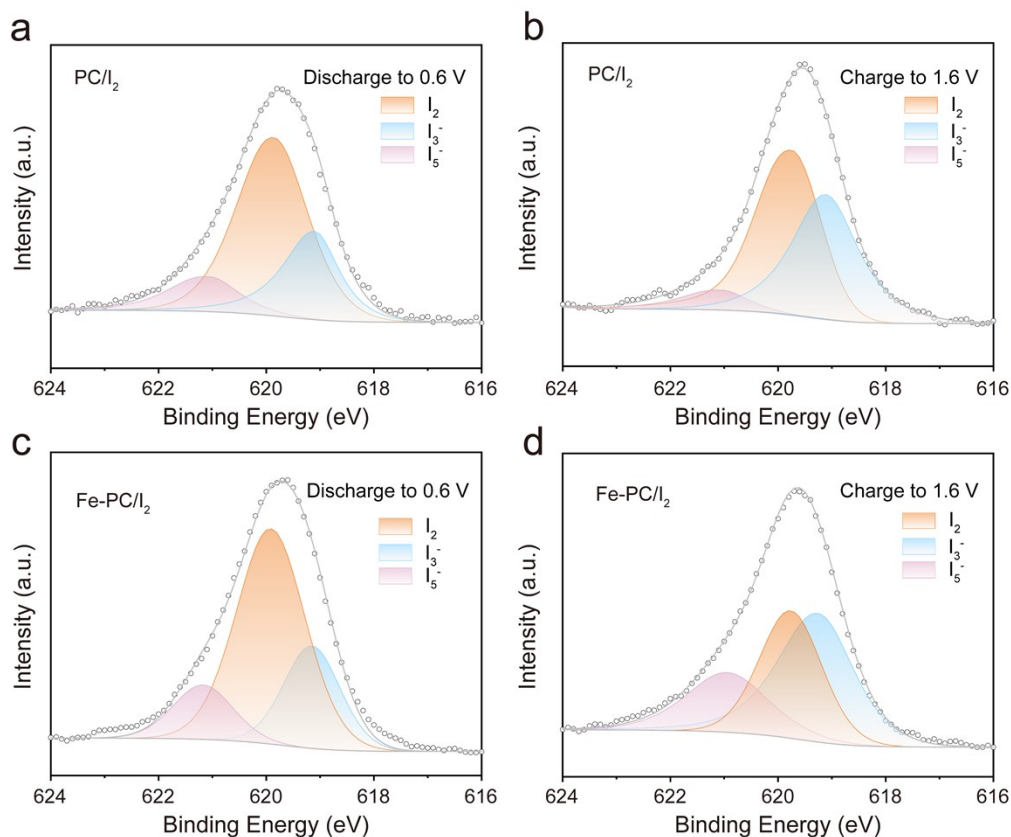

**Figure S10.** High-resolution I 3d XPS spectra of (a-b) PC/I<sub>2</sub> and (c-d) Fe-PC/I<sub>2</sub> electrodes at different charge/discharge states under  $-40^{\circ}\text{C}$ .

The I 3d XPS spectra were deconvoluted into three peaks corresponding to I<sub>3</sub><sup>-</sup> (619.2 eV), I<sub>2</sub> (619.8 eV), and I<sub>5</sub><sup>-</sup> (621.1 eV), which are in good agreement with recent works.<sup>1-3</sup> As shown in Fig. S10 (a) and (c), at the fully discharged state (0.6 V), characteristic peaks at 619.2, 619.8, and 621.1 eV are observed, which are assigned to I<sub>3</sub><sup>-</sup>, I<sub>2</sub>, and I<sub>5</sub><sup>-</sup> species, respectively. Upon full charge to 1.6 V (Fig. S10 (b) and (d)), the Fe-PC/I<sub>2</sub> electrode exhibits a higher proportion of I<sub>5</sub><sup>-</sup> and I<sub>3</sub><sup>-</sup> species, whereas the PC/I<sub>2</sub> electrode primarily shows I<sub>2</sub> and a lower content of I<sub>5</sub><sup>-</sup>. This distinct difference provides strong evidence that the iodine redox reaction on the Fe-PC/I<sub>2</sub> electrode proceeds via a liquid–liquid pathway.

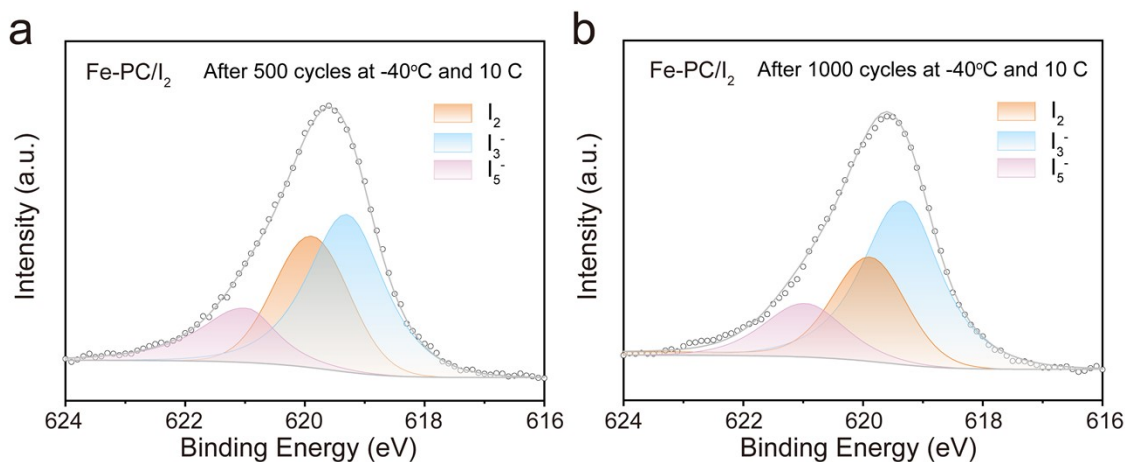

**Fig. S11** I 3d XPS spectra of Fe-PC/I<sub>2</sub> electrode at 1.6 V: (a) after 500 cycles, (b) after 1000 cycles at  $-40^{\circ}\text{C}$  and 10 C.

The I 3d XPS spectra of the electrodes for Fe-PC/I<sub>2</sub> after 500 and 1000 cycles were collected at 1.6 V to monitor the evolution of iodine species. After 500 and 1000 cycles (Fig. S11(a) and (b)), the characteristic peak of solid I<sub>2</sub> (619.8 eV) is markedly suppressed, while two prominent peaks emerge at 619.2 eV and 621.1 eV corresponding to I<sub>3</sub><sup>-</sup> and I<sub>5</sub><sup>-</sup> species, respectively. These results demonstrate that the Fe-PC electrode effectively confines the ACN-I<sub>2</sub> charge-transfer complex and suppresses the accumulation of solid iodine during prolonged cycling.

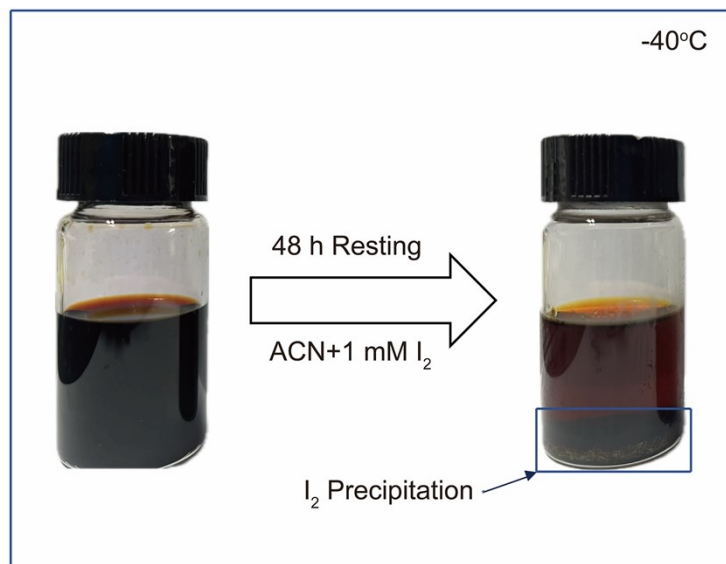

**Figure S12.** Visual dissolution experiment of iodine powder in ACN-based electrolyte (1 M Zn(ClO<sub>4</sub>)<sub>2</sub> in ACN) at -40°C.

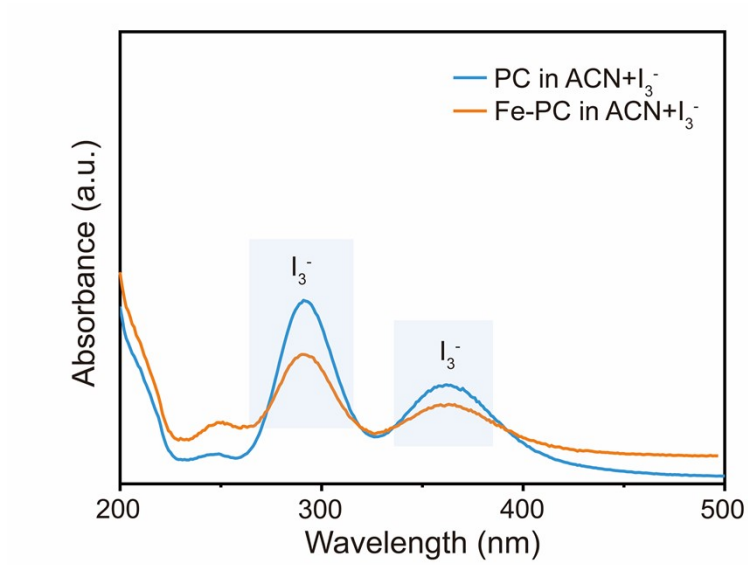

**Figure S13.** UV-vis spectra of the ACN-based electrolyte containing I<sub>3</sub><sup>-</sup> (1 mM) after immersion with PC and Fe-PC.

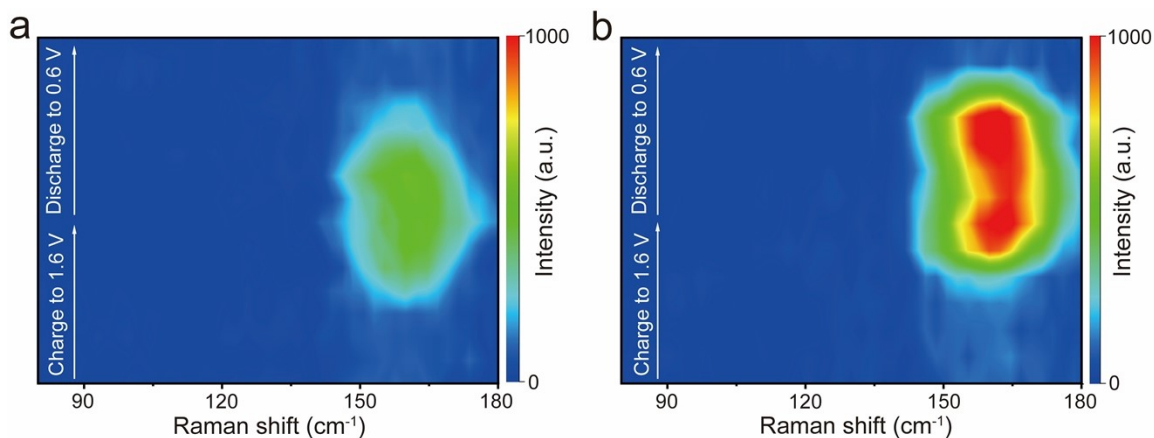

**Figure S14.** (a) In situ Raman spectroscopy of PC/I<sub>2</sub> at 25°C. (b) In situ Raman spectroscopy of Fe-PC/I<sub>2</sub> at 25°C.

The characteristic polyiodide (I<sub>5</sub><sup>-</sup>) peak at 160 cm<sup>-1</sup> for the Fe-PC/I<sub>2</sub> electrode progressively intensifies with increasing charge voltage and reversibly diminishes during discharge at 25°C (Fig. S14). This evolution reveals a sequential conversion of iodine species into high-order polyiodides at elevated charge voltages. Conversely, the persistently weak I<sub>5</sub><sup>-</sup> signals observed for PC/I<sub>2</sub> electrode throughout the charge/discharge process indicate incomplete iodine conversion and inferior electrochemical reversibility.

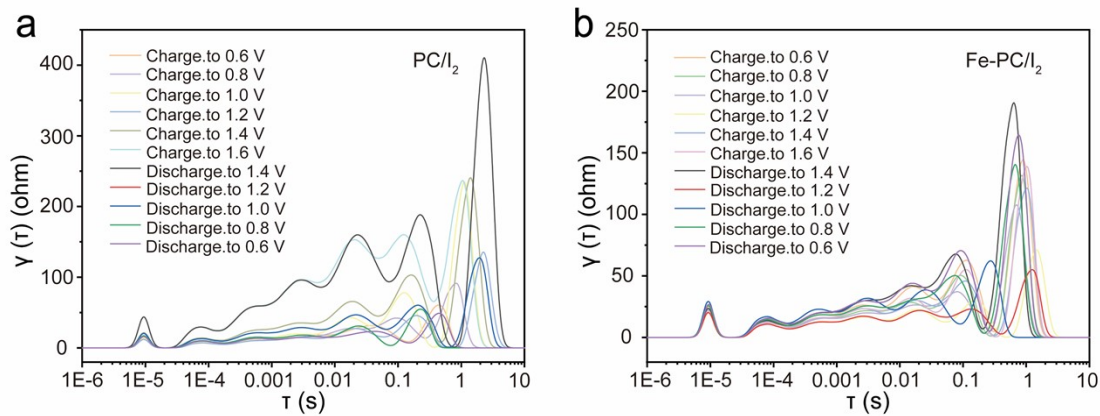

**Figure S15.** DRT analysis of (a)  $PC/I_2$ , (b)  $Fe-PC/I_2$  at  $-40^\circ C$ .

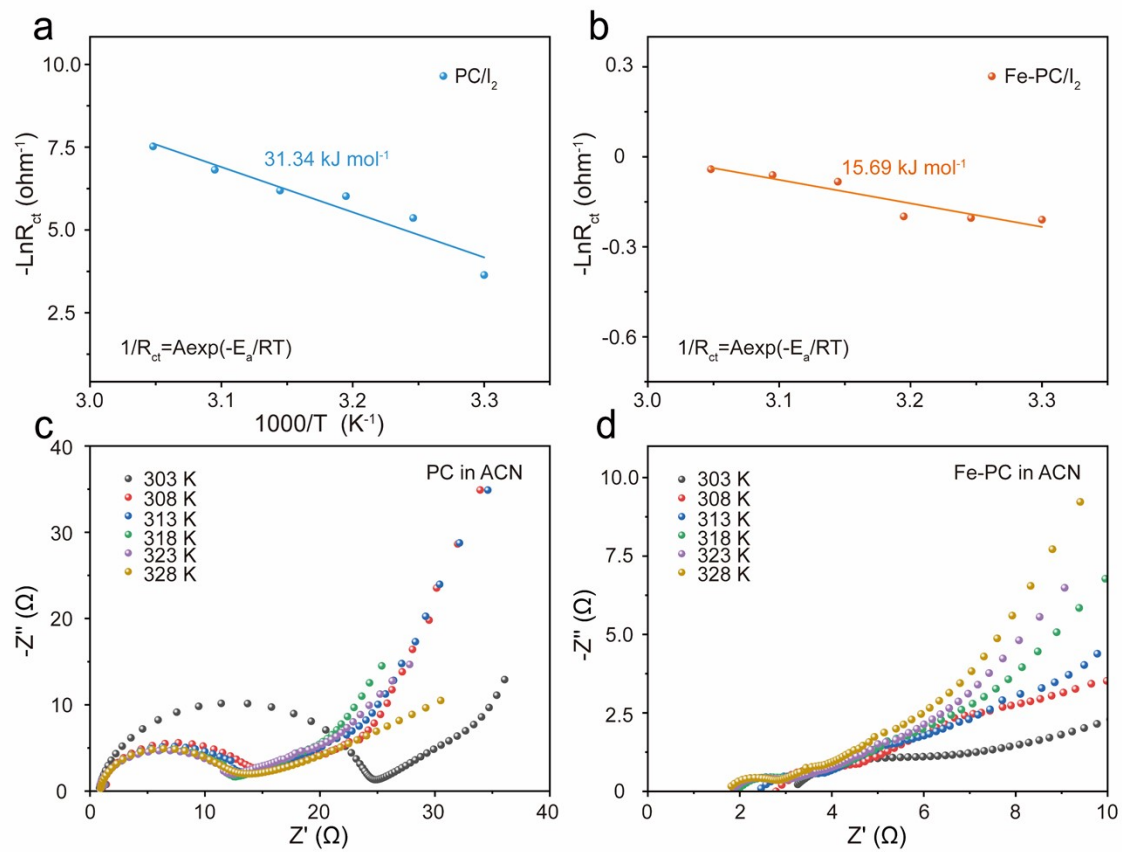

**Figure S16.** Arrhenius curves and comparison of activation energies of (a) PC/I<sub>2</sub>, (b) Fe-PC/I<sub>2</sub> electrodes. EIS spectrums of (c) PC/I<sub>2</sub>, (d) Fe-PC/I<sub>2</sub> at different temperatures.

## References

- 1 T. Xiao, J.-L. Yang, R. J. Xu, H. Xu, H. Liu, J. Li, H. Bao, X. Jin, S.-J. Hwang, Z. Wang and H. J. Fan, *J. Am. Chem. Soc.*, 2025, **147**, 28820-28830.
- 2 X. Li, Y. Wang, Z. Chen, P. Li, G. Liang, Z. Huang, Q. Yang, A. Chen, H. Cui, B. Dong, H. He and C. Zhi, *Angew. Chem. Int. Edit.*, 2022, **61**, e202113576.
- 3 M. Li, W. Wang, Y. Liu, Q. Wang, T. Wang, X. He, Z. Zhou, H. Li, M. Zhou, K. Wang and K. Jiang, *Energy Environ. Mater.*, 2026, DOI: 10.1002/eem2.70236.
